# Supplementary material
Source: Royal Society of Chemistry journal article supplement (doi:10.1039/d5ja00515a)
Supplement: d5ja00515a1.xlsx [file d5ja00515a1.xlsx]

## Sheet: 改变升温与保温时间
改变升温时间与保温时间正交实验催化热解汞的回收率和同位素组成(The recovery rate and isotopic composition of catalytic pyrolyzed mercury were obtained by orthogonal experiments of changing the heating time and holding time)
Sample	Heating time (min)	Holding time (min)	Recovery (%)	δ202Hg (‰)	Δ199Hg (‰)
NH1	50	10	33.9478	-1.41771	0.243558
		20	65.1163	-1.12751	0.149357
		30	70.17	-0.652091	0.286918
			73.15	-0.977047	0.25273
		40	96.9071	-0.60065	0.219732
			92.876	-0.49508	0.210182
			103.14	-0.496649	0.227987
			94.2146	-0.605374	0.22541
			103.397	-0.51057	0.215128
		50	105.91	-0.459584	0.250475
			99.1782	-0.545856	0.270716
		60	105.046	-0.473102	0.216937
			100.788	-0.399642	0.244619
	20	40	49.8885	-0.819028	0.122891
			50.25	-1.04	0.19
			35.3071	-1.26595	0.258021
	30		82.2393	-0.375472	0.263404
			74.6079	-0.538496	0.164719
			62.4306	-0.711846	0.187676
	40		93.3532	-0.582641	0.226773
			80.13	-0.63	0.22
			88.9333	-0.677669	0.208674
	60		97.5247	-0.501437	0.198158
			100.116	-0.655763	0.30043

## Sheet: 催化剂配比
不同催化剂配比催化热解回收率和同位素组成(Recovery rates and isotopic compositions of catalytic pyrolysis with different catalyst ratios)
Sample	Proportions of MnO2 (%)	Proportions of Co₃O₄ (%)	Proportions of CaO (%)	Recovery (%)	δ202Hg (‰)	Δ199Hg (‰)
NH1	90	0	10	99.5168	-0.721565	0.197826
				102.817	-0.672348	0.0865132
	80	10		97.7349	-0.535835	0.177674
				96.5538	-0.397746	0.221643
	70	20		94.3872	-0.67065	0.189732
				98.98	-0.43508	0.190182
				103.573	-0.456649	0.197987
				97.5247	-0.645374	0.22541
				100.116	-0.51057	0.215128
	60	30		94.6344	-0.445974	0.209517
				91.085	-0.743032	0.268387
	50	40		70.599	-0.787657	0.306283
				88.2678	-0.87598	0.266352
	40	50		64.2126	-1.16309	0.155649
				68.2296	-0.980371	0.232196
	0	90		56.5815	-0.929349	0.324224
				58.2846	-0.912557	0.241514

## Sheet: 4A与样品混合
GSS4A与NH1不同比例混合催化热解的回收率和同位素组成(Recovery rate and isotopic composition of catalytic pyrolysis by mixing GSS4A and NH1 in different proportions)
The contribution ratio of total mercury in GSS4A (%)	Recovery (%)	δ202Hg (‰)	Δ199Hg (‰)
0	96.9071	-0.60065	0.219732
	92.876	-0.49508	0.210182
	103.14	-0.496649	0.227987
	94.2146	-0.605374	0.22541
	103.397	-0.51057	0.215128
50	1.0234	-0.95431	-0.0828658
	1.03849	-0.896351	-0.0264053
	1.01439	-1.27511	-0.0351887
66.7	1.00583	-1.15784	-0.213979
	0.963045	-1.1242	-0.137207
	1.00068	-1.18148	-0.118032
75	0.97734	-1.48277	-0.27008
	0.967671	-1.48681	-0.243004
	1.03029	-1.16463	-0.214078
100	1.01293	-1.76226	-0.351856
	0.947342	-1.50512	-0.327231
	1.08537	-1.74687	-0.283481

## Sheet: 其他样品
天然样品催化热解回收率、同位素组成对比(Comparison of recovery rates and isotopic compositions of catalytic pyrolysis of natural samples)
Sample	Whether to add a catalyst or not	Recovery (%)	δ202Hg (‰)	Δ199Hg (‰)
NH2	not	48.4356	-0.988671	0.104062
		57.6354	-2.27388	0.124148
		56.1334	-1.87146	0.229977
NH3		76.3942	-1.44378	0.157737
		64.3936	-2.05933	0.176049
		52.2556	-2.09224	0.184326
HZW		79.6542	-4.10552	0.227379
		76.4636	-4.10133	0.217151
		25.9301	-3.88523	0.208007
GBW07335		61.723	-1.23871	0.0871151
		44.9836	-1.24985	0.161282
GBW07336		33.7199	-1.66843	0.0322465
		44.6242	-1.80726	0.152218
NH2	do	101.049	-1.14557	0.188302
		97.8447	-1.46358	0.208328
		100.435	-1.37484	0.168081
NH3		96.7389	-1.56165	0.112819
		103.231	-1.38152	0.185744
HZW		102.926	-3.59147	0.107958
		98.7235	-3.58473	0.0648061
		106.557	-3.39661	0.161285
GBW07335		105.72	-1.16322	0.0521015
		97.4027	-1.31442	0.110924
GBW07336		90.9826	-1.27445	0.0724344
		102.36	-1.47596	0.120221

## Sheet: 微量元素含量变化
是否加入催化剂热解回收率、热解液中Hg含量和微量元素含量(Whether a catalyst is added, the recovery rate of pyrolysis, the Hg content in the pyrolysis liquid and the content of trace elements)
Sample information	Recovery (%)	Hg (ng/ml)	V (ng/ml)	Cr (ng/ml)	Ni (ng/ml)	Mo (ng/ml)	U (ng/ml)	Ba (ng/ml)	Mn (ng/ml)	Cu (ng/ml)	As (ng/ml)	Sb (ng/ml)	Zn (ng/ml)	Tl (ng/ml)	Pb (ng/ml)	Cd (ng/ml)	Te (ng/ml)
NH1-1#	3.68652	0.254581	0.724062	3.05753	4.50577	7.34866	0.0229568	0.711078	7.53005	73.8107	4.30802	0.0649339	233.075	55.6968	168.042	2.86542	0.958569
NH1-2#	14.7463	0.876712	5.10402	21.9417	4.97466	6.76218	0.0463073	0.614278	7.24282	748.134	1.77135	0.0689332	413.635	24.853	883.574	15.7217	0.376575
NH1-3#	13.0824	0.939335	0.188479	4.26397	32.4247	0.80628	0.00324841	0.518857	18.3596	581.521	5.0842	0.0329058	520.9	84.2347	558.032	27.3547	1.65948
NH1-4#	41.1955	1.45455	0.908955	2.4366	2.03028	0.879279	0.00555984	2.09373	105.995	218.057	0.409044	0.145208	228.892	9.30614	139.486	32.8778	0.0736729
NH1-5#	53.9399	1.50358	0.232279	3.07633	3.14201	0.947225	0.00216341	2.3806	266.623	168.889	0.707264	0.111725	139.91	8.68683	103.596	18.234	0.262619
NH1-1*	101.297	4.08741	0.211103	1.92627	1.3077	0.344003	0.00569504	2.52558	366.398	138.977	0.155141	0.18431	31.7045	30.6046	171.182	4.75859	0.142001
NH1-2*	103.042	4.17527	0.482302	20.5354	2.51114	2.48356	0.0049017	2.61471	795.553	284.071	0.336064	0.159719	181.774	62.213	479.746	12.2769	0.141655
NH1-3*	101.023	4.0666	0.173447	1.15443	0.964147	0.121348	0.00298887	2.2987	221.744	15.0384	0.155718	0.17051	16.1688	17.3457	113.138	2.17363	0.204727
NH3-1#	48.4356	2.77104	0.294569	5.16658	18.1564	8.12759	0.00835548	1.0384	17.1224	753.977	6.06166	0.0681069	1880.68	117.713	1364.64	16.5017	1.88143
NH3-2#	27.6354	1.52642	0.284075	57.0062	13.9823	19.4097	0.00424034	0.573787	31.7916	1981.09	8.43761	0.109341	1825.93	29.6768	1128.5	42.2678	4.08941
NH3-3#	56.1334	3.04501	2.13859	9.84963	26.5927	1.21639	0.0182249	0.652895	20.2198	1279.47	3.13448	0.0384238	947.259	39.1115	754.566	23.8285	1.28822
NH3-1*	101.049	4.05935	0.401678	13.7227	26.6562	1.37991	0.00534655	0.805412	322.67	569.704	0.159634	0.12167	66.0024	137.253	987.781	23.9732	0
NH3-2*	97.8447	3.96805	0.612948	5.0162	0.58136	0.48513	0.00569467	0.931964	650.882	411.046	0.433581	0.022044	128.102	82.2806	523.645	14.5305	0
NH3-3*	100.435	4.00341	0.397172	5.53444	1.27403	0.354748	0.00368107	1.12894	664.069	642.032	0.411214	0.0349977	124.935	165.514	1313.28	12.9403	0
NH4-1#	76.3942	3.03131	5.15718	9.16397	24.3757	5.45582	0.0416011	1.24022	19.2564	811.906	3.54557	0.138903	1300.14	68.8403	690.95	16.5525	1.11242
NH4-2#	64.3936	3.45205	0.805747	39.5663	7.67525	15.9985	0.00604773	0.666311	24.458	1004.48	10.6378	0.441297	861.841	84.2359	880.131	34.9402	10.4137
NH4-3#	52.2556	2.85714	1.84527	11.8386	25.0714	1.93531	0.0180289	0.381975	41.6158	1300.95	2.45383	0.208134	1140.86	58.9355	940.361	34.0074	2.52512
NH4-1*	96.7389	3.98605	0.261496	3.0815	0.921038	1.04452	0.0203143	1.09003	317.954	204.456	0.4989	0.124905	36.743	91.0553	466.155	9.75936	0
NH4-2*	103.231	4.06726	0.154623	4.0353	0.449959	0.326302	0.00400986	0.736709	424.825	395.665	0.456123	0.0188509	114.534	139.248	682.357	12.9186	0.0674815
HZW-1#	79.6542	5.12487	0.200312	43.4234	3.62792	20.2566	0.0112976	0.601759	4.97501	291.211	122.469	0.0431527	602.291	9.72967	331.193	5.4741	0.706011
HZW-2#	76.4636	4.25584	0.14183	10.9707	2.75461	11.3217	0.013603	8.0934	3.36364	324.822	0.924189	0.0244723	759.05	14.7774	225.186	5.79828	0.43751
HZW-3#	25.9301	1.57563	0.156306	92.0466	23.7137	17.482	0.00652268	0.498306	27.3732	1801.15	2.63792	0.0289522	3775.15	20.8098	1001.21	30.8359	2.77239
HZW-1*	102.926	3.77448	0.305202	4.77105	0.707575	0.352227	0.00506958	1.28207	488.863	431.825	0.447936	0.280423	133.156	141.411	696.815	13.1617	0
HZW-2*	98.7235	4.01187	2.25517	1.75219	0.700497	0.174888	0.0181053	0.970053	118.493	17.3122	0.073104	0.0238842	26.565	29.6406	146.255	2.97213	0
HZW-38	106.557	4.76098	0.0576917	2.42602	0.28016	0.362484	-0.000347292	0.989703	437.348	84.2689	0.0382846	0.0220588	76.2456	13.6979	254.864	7.9462	0
GBW07335-1#	61.723	3.86572	1.75283	16.3055	6.1126	21.3658	0.0189523	1.06942	1799.87	726.769	0.79508	0.587191	779.963	244.978	2205.95	5.29941	3.13566
GBW07335-2#	44.9836	2.52289	5.64118	3.8667	2.78785	7.58368	0.0483583	1.66677	1031.06	261.744	0.63086	0.0148263	737.8	149.277	1552.09	2.9977	0.193168
GBW07335-3*	105.72	5.66022	1.01593	3.27028	1.37744	2.37929	0.0063057	0.589882	231.775	365.875	0.323228	0.0439388	399.476	80.4679	2332.46	4.67527	0
GBW07335-4*	97.4027	5.40793	0.412389	6.30371	13.5567	4.41398	0.0141259	0.720888	355.19	654.645	0.177588	0.0353032	295.301	106.279	6227.31	9.40492	0.0588693
GBW07336-1#	33.7199	2.30926	0.80521	3.81972	5.7524	1.52612	0.00501284	1.83795	122.913	501.45	0.275107	0.0268868	122.565	72.979	2320.27	15.3015	0.120086
GBW07336-2#	44.6242	3.26551	0.87315	79.8195	71.9394	33.9847	0.0138581	2.35132	688.295	4276.59	7.40143	0.16603	1947.61	138.698	4689.1	48.4923	9.71232
GBW07336-3*	90.9826	5.01526	2.97895	7.74321	2.37769	2.98576	0.0157874	1.04539	599.935	981.924	0.48464	0.0464228	814.07	104.54	4085.01	9.45558	0
GBW07336-4*	102.36	5.23558	0.62424	1.34116	0.524574	0.279548	0.0227902	0.403901	39.6855	1.9816	0.0634003	0.0210598	6.28431	18.6588	12.137	0.0294588	0
#:Non-catalytic pyrolysis *:Catalytic pyrolysis

## Sheet: 添加实验
Te、Se和S复合添加对NIST 3133同位素组成的影响 (The influence of the combined addition of Te, Se and S on the isotopic composition of NIST 3133)
Hg (ng/ml)	Te (ng/ml)	Se (ng/ml)	S (ng/ml)	δ202Hg (‰)	Δ199Hg (‰)
1	0.0001			-0.0437893	0.0157722
1	0.001			0.00303197	0.0572712
1	0.01			0.0249262	-0.0199011
1	0.1			-0.0141492	0.0272535
1	1			0.0414369	0.00910038
1	10			-0.0279615	0.00586191
1	100			0.0144861	0.024775
1	1000			0.779741	-0.0981999
1	2000			0.511968	-0.0165098
1	4000			0.353999	0.0309962
1	10000			0.779741	-0.0981999
1		0.01		-0.00909147	-0.00955019
1		0.1		0.00370393	-0.0305365
1		1		-0.0252574	-0.000148285
1		10		0.0498347	-0.057555
1		100		-0.0993327	-0.00871568
1		200		-0.050855	0.045974
1		500		-0.245501	0.0221954
1		1000		-0.292947	-0.00255326
1		2000		-0.931901	0.0435919
1			1	0.00235732	-0.00651489
1			10	0.113488	-0.0735974
1			50	-0.0868913	-0.0136304
1			100	-0.316891	-0.0545467
1			1000	-0.648936	-0.144352
1			2000	-0.768887	0.0273748
1	100	1		0.171118	-0.0342394
1	1000	1		0.259372	-0.0564793
1	100	10		0.357731	-0.0392229
1	1000	10		0.324046	0.0344026
1	1000	100		0.383331	-0.0344232
1	100	100		0.372892	0.0191346
1	2000	100		0.471213	-0.0133451
