# Supplementary material
Source: Royal Society of Chemistry journal article supplement (doi:10.1039/d5ja00515a)
Supplement: d5ja00515a2.pdf [file d5ja00515a2.pdf]

Supplemental information for

**A MnO<sub>2</sub>-Co<sub>3</sub>O<sub>4</sub>-CaO Catalytic Pyrolysis Method for Mercury Isotope Analysis  
in Marine Sediments**

Yu Lei<sup>1,2</sup>, Guangyi Sun<sup>1,2</sup>\*, Chenmeng Yang<sup>1</sup>, Xinyu Li<sup>1</sup>, Xinbin Feng<sup>1,2</sup>\*

<sup>1</sup> State Key Laboratory of Environmental Geochemistry, Institute of Geochemistry,  
Chinese Academy of Sciences, Guiyang 550081, China

<sup>2</sup> University of Chinese Academy of Sciences, Beijing 100049, China

**\*Corresponding author,**

E-mail: [sunguangyi@mail.gyig.ac.cn](mailto:sunguangyi@mail.gyig.ac.cn), and [fengxinbin@mail.gyig.ac.cn](mailto:fengxinbin@mail.gyig.ac.cn)

CAPTION OF SUPPLEMENTARY FIGURES AND DATA TABLES

**Fig. S1** (a) Hg recovery for standard GSS4a mixed with sample NH1 at different mass ratios via catalytic pyrolysis. (b) Comparison of Hg recovery with/without catalyst for different samples NH2, NH3, HZW, GBW07335 and GBW07336. Error bars represent 1SD.

**Fig. S2** Heat map showing correlation between catalytic pyrolysis Hg recovery and content of selected matrix elements in the absorbing solution. Red indicates positive correlation, blue indicates negative correlation; larger circle size indicates stronger correlation.

**Fig. S3** Concentration changes of refractory elements (V, Cr, Ni, Mo, U, Ba) in the pyrolysis absorbing solution before and after catalyst addition.

**Fig. S4** Concentration changes of moderately volatile elements (Mn, Cu, As, Sb) in the pyrolysis absorbing solution before and after catalyst addition.

**Fig. S5** Concentration changes of highly volatile elements (Zn, Tl, Pb, Cd, Te) in the pyrolysis absorbing solution before and after catalyst addition.

**Fig. S6** Structural Equation Modeling (SEM) of the Effects of Recovery Efficiency and Refractory, Moderately Volatile, and Highly Volatile Element Contents in the Absorption Solution on Isotopic Composition. (n = 8, composite reliability (rho\_c) = 0.862, and average variance extracted (AVE) = 0.571. R<sup>2</sup>=0.431 \*\*\*P < 0.001, \*\*P < 0.01, \*P < 0.05, and P < 0.1. The gray lines indicate nonsignificant paths (P > 0.1)).

**Table S1** Mercury concentrations in the samples used in this study.

**Table S2** The windows of the mass ratio of catalyst to sediment sample and of catalyst to total mercury in the catalytic pyrolysis of marine sediments.

**Table S3** Recoveries and isotopic compositions of real samples (NH1, NH2, HZW) and standard samples (GBW07335, GBW07336) pyrolyzed under conditions with and without catalyst addition.

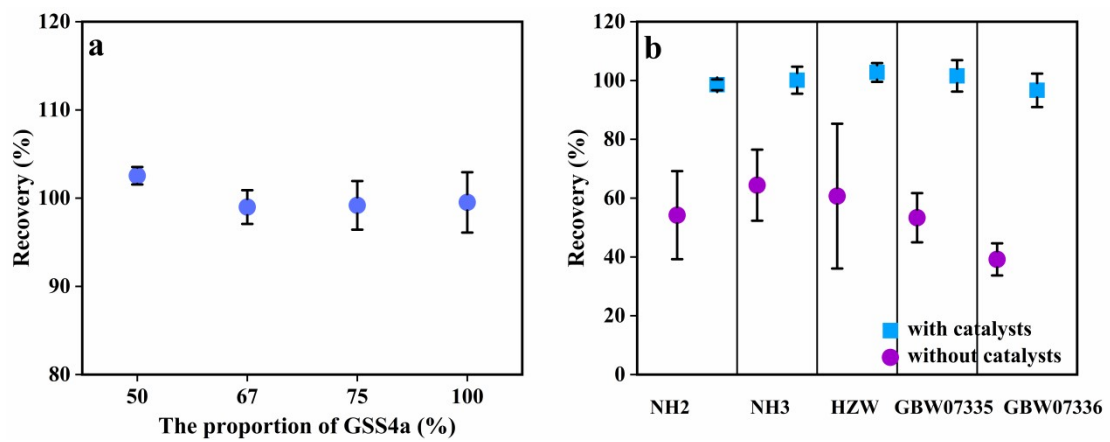

**Fig.S1**

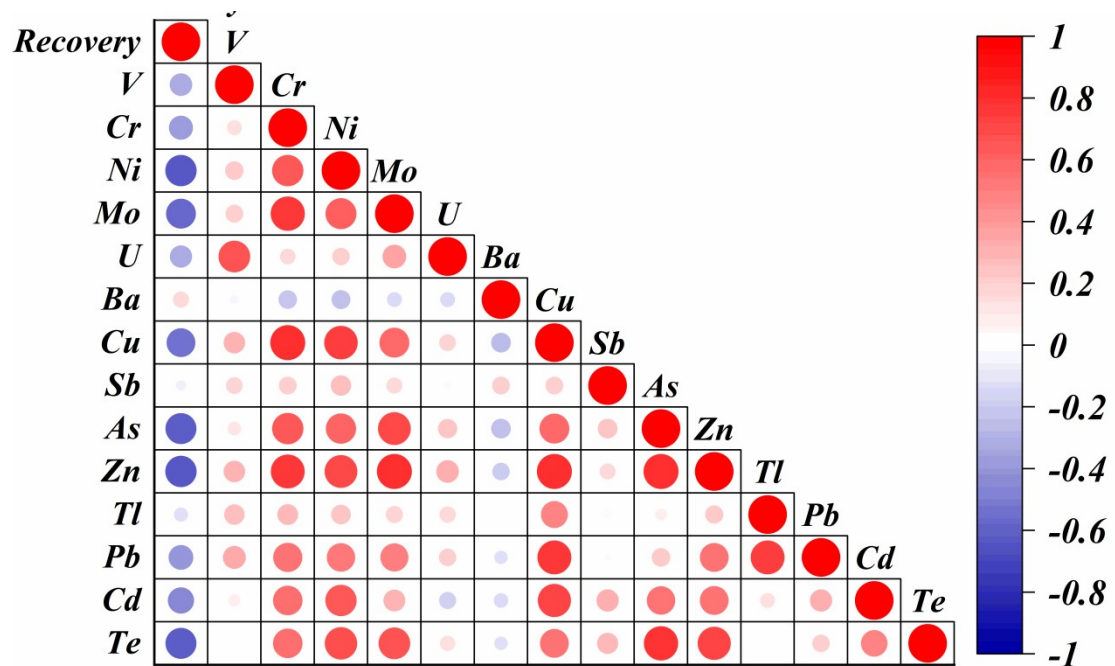

Fig. S2

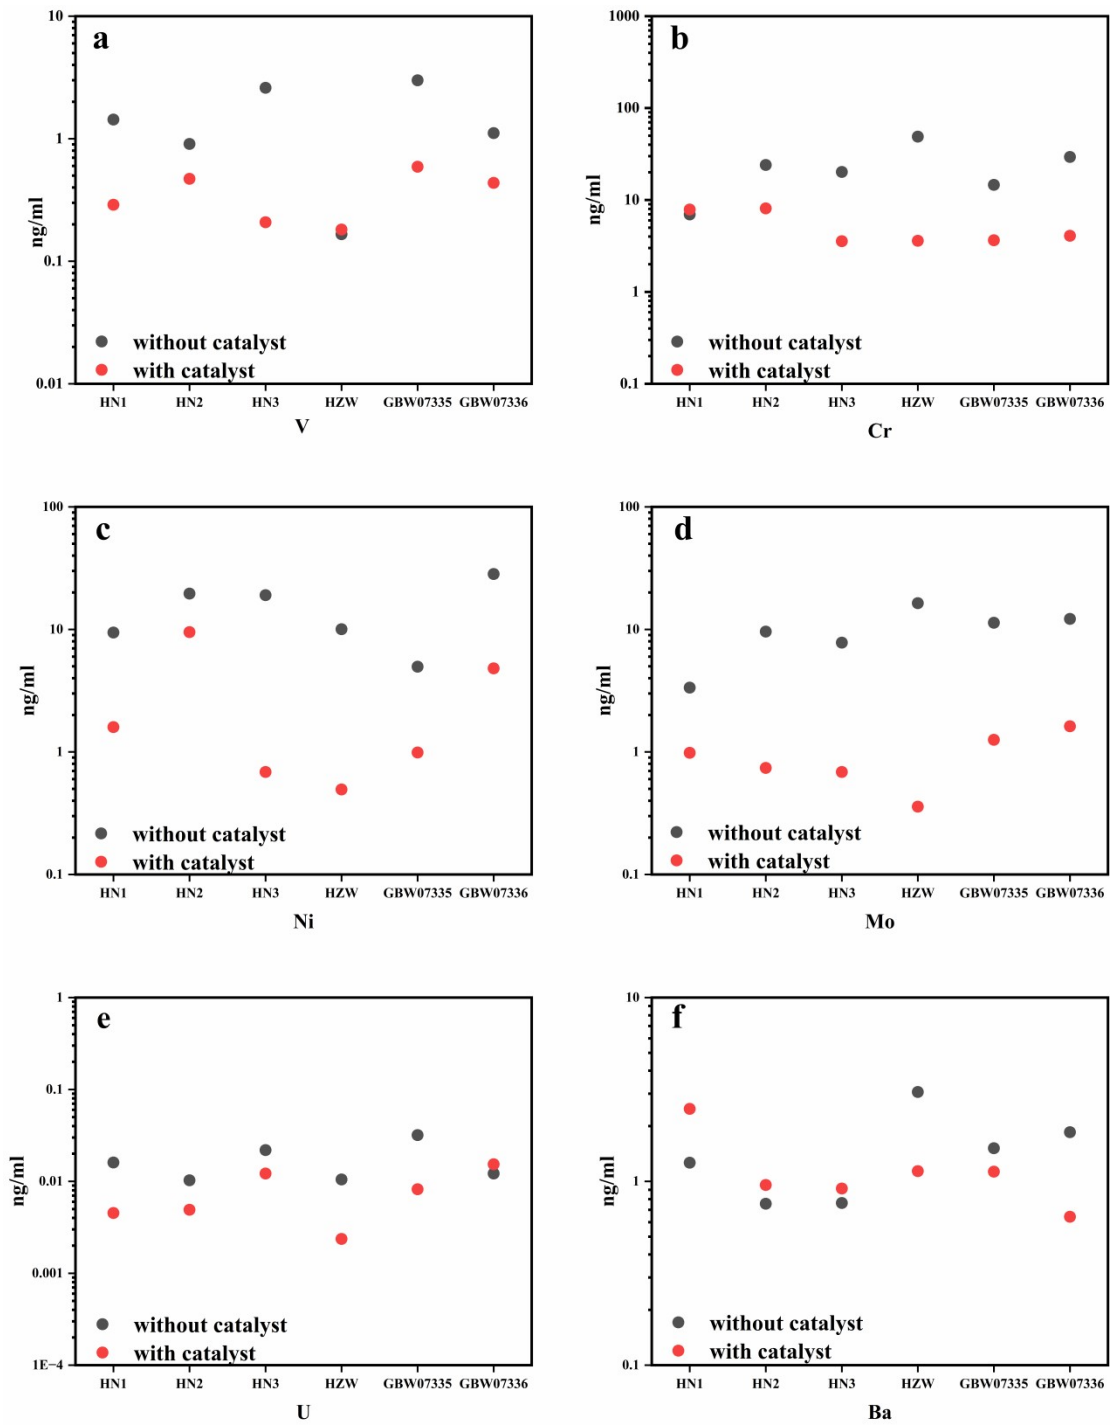

Fig. S3

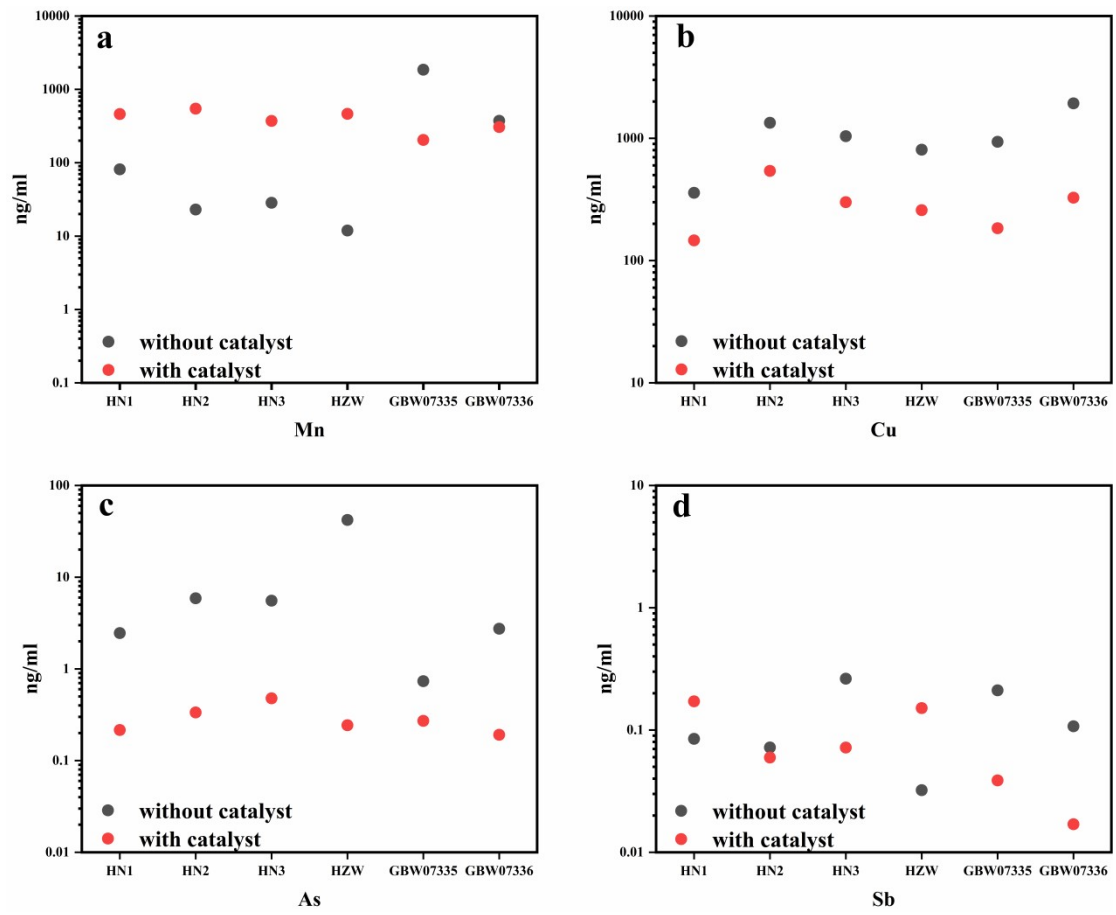

Fig. S4

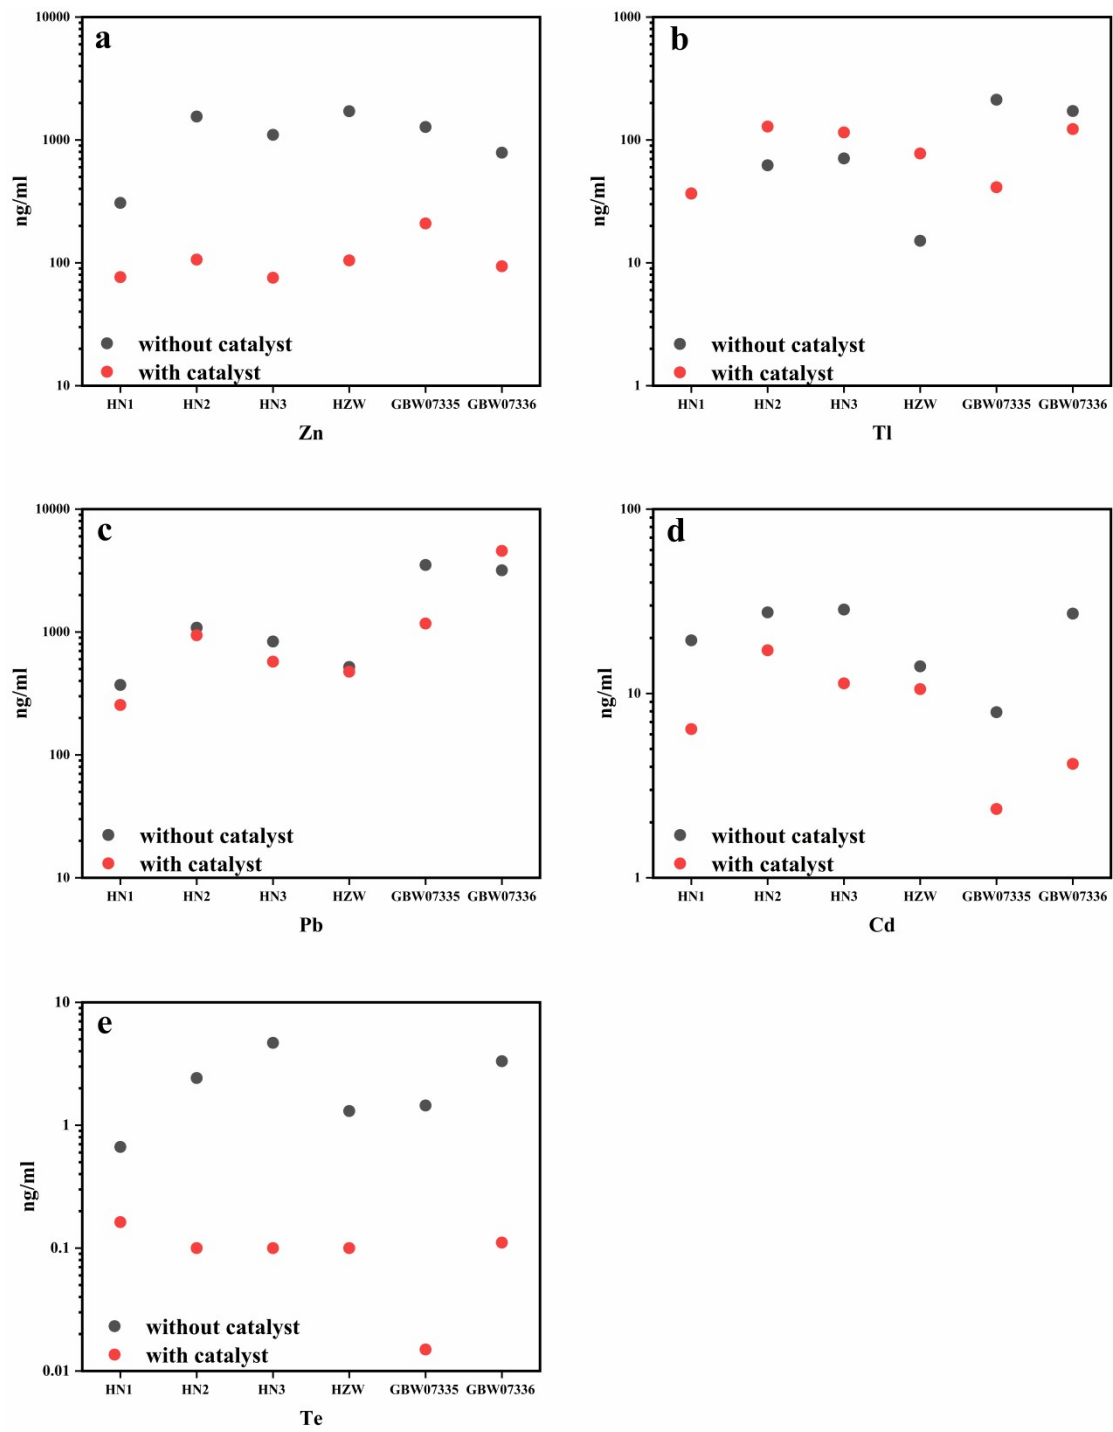

Fig. S5

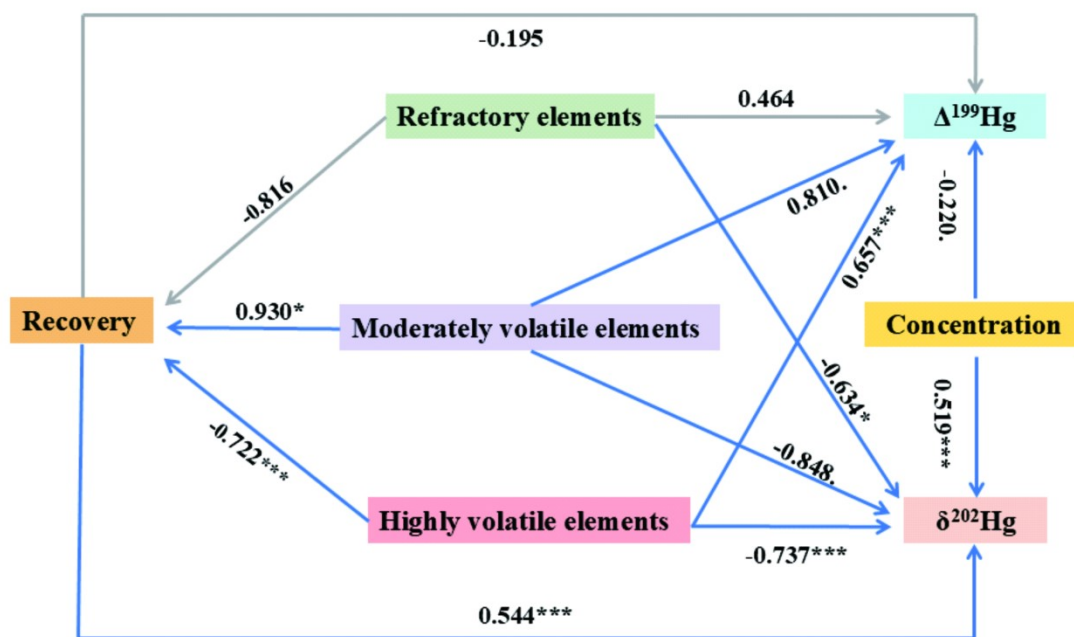

Fig. S6

Table S1

| Sample ID | Concentration THg (ng/g) | Standard Deviation | Replicate Analysis (n) |
|-----------|--------------------------|--------------------|------------------------|
| GSS4a     | 72                       | 2                  | 6                      |
| GSS5a     | 724                      | 26.7               | 5                      |
| GBW07335  | 19                       | 1                  | 5                      |
| GBW07336  | 35                       | 1                  | 5                      |
| NH1       | 223                      | 8                  | 6                      |
| NH2       | 56                       | 2                  | 6                      |
| NH3       | 38                       | 1                  | 6                      |

Table S2

| Catalyst/Sample<br>(w/w, g/g) | Total<br>mercury/catalyst<br>(w/w, ng/g) | Recovery<br>(%) | $\delta^{202}\text{Hg}$<br>(‰) | $\Delta^{199}\text{Hg}$<br>(‰) |
|-------------------------------|------------------------------------------|-----------------|--------------------------------|--------------------------------|
| 27                            | 2                                        | 89.8            | -0.46                          | 0.20                           |
| 25                            | 2                                        | 91.9            | -0.44                          | 0.19                           |
| 24                            | 2                                        | 99.3            | -0.48                          | 0.20                           |
| 24                            | 2                                        | 96.9            | -0.67                          | 0.19                           |
| 23                            | 2                                        | 94.2            | -0.65                          | 0.23                           |
| 22                            | 2                                        | 89.2            | -0.76                          | 0.18                           |
| 21                            | 2                                        | 103.4           | -0.51                          | 0.22                           |
| 20                            | 2                                        | 109.9           | -0.57                          | 0.22                           |
| 17                            | 3                                        | 64.9            | -0.18                          | 0.14                           |
| 16                            | 3                                        | 56.9            | -0.18                          | 0.16                           |
| 15                            | 3                                        | 57.4            | -0.18                          | 0.20                           |
| 12                            | 4                                        | 38.4            | -1.60                          | 0.35                           |
| 10                            | 5                                        | 38.7            | -0.33                          | 0.19                           |

**Table S3**

| Method              | Sample   | Recovery<br>(%, 1SD) | $\delta^{202}\text{Hg}$<br>(‰, 1SD) | $\Delta^{199}\text{Hg}$<br>(‰, 1SD) | n |
|---------------------|----------|----------------------|-------------------------------------|-------------------------------------|---|
| Without<br>catalyst | NH1      | 36.6 ± 16.3          | -1.15 ± 0.20                        | 0.26 ± 0.02                         | 3 |
|                     | NH2      | 57.2 ± 19.2          | -1.71 ± 0.54                        | 0.15 ± 0.06                         | 3 |
|                     | HZW      | 78.1 ± 2.3           | -4.03 ± 0.10                        | 0.22 ± 0.01                         | 3 |
|                     | GBW07335 | 53.4 ± 8.4           | -1.24 ± 0.01                        | -0.12 ± 0.05                        | 2 |
|                     | GBW07336 | 39.2 ± 5.5           | -1.74 ± 0.07                        | -0.09 ± 0.06                        | 2 |
| with<br>catalyst    | NH1      | 100.9 ± 1.9          | -0.54 ± 0.08                        | 0.21 ± 0.01                         | 5 |
|                     | NH2      | 99.8 ± 1.7           | -1.39 ± 0.18                        | -0.17 ± 0.05                        | 3 |
|                     | HZW      | 96.9 ± 7.1           | -3.52 ± 0.11                        | -0.11 ± 0.05                        | 3 |
|                     | GBW07335 | 101.6 ± 5.4          | -1.24 ± 0.08                        | -0.08 ± 0.03                        | 2 |
|                     | GBW07336 | 96.7 ± 5.7           | -1.38 ± 0.10                        | -0.11 ± 0.02                        | 2 |
